1 *Prevalence of floating toe and its relationship with static postural stability in children: The*

2 *Yamanashi adjunct study of the Japan Environment and Children's Study (JECS-Y)*

3

4 Short title: Prevalence of floating toe and its relationship with static postural stability in children

5

6 Taro Fujimaki<sup>1</sup>, Masanori Wako<sup>1\*</sup>, Kensuke Koyama<sup>1</sup>, Naoto Furuya<sup>1</sup>, Ryoji Shinohara<sup>2</sup>, Sanae

7 Otawa<sup>2</sup>, Anna Kobayashi<sup>2</sup>, Sayaka Horiuchi<sup>2</sup>, Megumi Kushima<sup>2</sup>, Zentaro Yamagata<sup>2</sup>, Hiroataka

8 Haro<sup>1</sup>, on behalf of The Yamanashi adjunct study of the Japan Environment and Children's Study

9 Group<sup>^</sup>

10

11 <sup>1</sup> Department of Orthopaedic Surgery, Faculty of Medicine, University of Yamanashi,

12 1110 Shimokato, Chuo-shi, Yamanashi, Japan

13 <sup>2</sup> Center for Birth Cohort Studies, Interdisciplinary Graduate School of medicine, University of

14 Yamanashi, 1110 Shimokato, Chuo-shi, Yamanashi, Japan

15

16 \* Corresponding author

17 E-mail address: [wako@yamanashi.ac.jp](mailto:wako@yamanashi.ac.jp) (MW)

18

19 ^ Membership of The Yamanashi adjunct study of the Japan Environment and Children's Study  
20 Group is provided in the Acknowledgments.

21

## 22 **Abstract**

23 Floating toe (FT) is a frequently seen condition in which a toe is inadequately in contact with the  
24 ground. Although toes play an important role in stabilizing standing posture and walking, many  
25 aspects of the effects of FT on the body remain unclear. To our knowledge, there have been no  
26 reports about the relationship between FT and postural stability, especially in children. This study  
27 aimed to clarify the prevalence of FT and its relationship with static postural stability in children.  
28 Of the 400 children aged 8 years who participated in our cohort study, 396, who were examined  
29 for static postural stability, were included in this study. Postural stability and FT were assessed  
30 using a foot pressure plate. The sway path length of the center of pressure and the area of the  
31 ellipse defined as the size of the area marked by the center of pressure were measured as an  
32 evaluation of static postural stability. We calculated the “floating toe score (FT score: small FT  
33 score indicates insufficient ground contact of the toes)” using the image of the plantar footprint  
34 obtained at the postural stability measurement. The FT rate was very high at more than 90%, and  
35 the FT score in the eyes-closed condition was significantly higher than that in the eyes-open  
36 condition in both sexes. The FT score significantly correlated with the center of pressure path and

37 area. Our results suggest that ground contact of the toes is not directly related to static postural  
38 stability in children, but it may function to stabilize the body when the condition becomes unstable,  
39 such as when the eyes are closed.

## 40 **Introduction**

41 Human feet support bodyweight, absorb impact, and push the body forward while walking, and  
42 the forefeet play an important role in standing firmly on the ground, stabilizing the body, and  
43 walking and running [1,2]. The toes are in contact with the ground for approximately three-  
44 quarters of the stance phase during walking and they distribute the load [3]. Toes are also thought  
45 to play an important role in the ability to stand firmly on the ground by stabilizing the body [4].  
46 Therefore, toe function is important for preserving healthy daily activities such as standing,  
47 moving, and walking.

48 Recently, “floating toe” (FT) has received attention as a possible cause of toe dysfunction [4,5].  
49 Originally, the condition reportedly occurred as a result of surgery, and is one of the most common  
50 complications of Weil osteotomy [6,7]. Previous studies concluded that FT results from excessive  
51 dorsiflexion or a lack of plantarflexion of the metatarsophalangeal joints [8–10]. Studies in Japan  
52 reported that FT influences dynamic balance, stride length, and walking speed [4,11]. Fukuyama  
53 et al. defined FT as a condition in which the toes do not contact the ground in the standing position  
54 and the weight does not shift to the toe while walking.

55 Although there are many unclear aspects of the effects of FT on the body in children, it is  
56 speculated that FT has some relation to body stability if the condition is due to functional  
57 deterioration of the toes. However, there are no reports on the relationship between FT and

58 postural stability, and it is not clear whether FT itself is an adverse condition in children.

59 Our institution has been conducting a cohort study of 8-year-old children since 2019, and we  
60 have been measuring the plantar pressure and static postural stability in the participants of this  
61 cohort study. Hence, we could meet the purpose of this study, which was to clarify the  
62 prevalence of FT and its relationship with static postural stability in 8-year-old children in this  
63 cohort.

64

## 65 **Materials and methods**

### 66 **Study Design**

67 The Japan Environment and Children's Study (JECS), which is a national project funded directly  
68 by the Ministry of the Environment, Japan, is a birth cohort study undertaken to elucidate the  
69 influence of environmental factors during the fetal period and early childhood on children's health,  
70 with follow-up until age 13. Details of the protocol and baseline data of the JECS are available  
71 elsewhere [12]. In our institution, our own additional study is being performed for children who  
72 will be 8 years old that year from July 2019. This study was approved by the institutional review  
73 board of our university (No 2020). Written informed consent was obtained from all participants'  
74 mothers or their partners in accordance with the Declaration of Helsinki.

### 75 **Participants**

76 Of the 400 children aged 8 years who participated in this additional survey conducted at our  
77 institution between July 2019 and February 2020, 396 children who were examined for static  
78 postural stability were included in the study.

## 79 **Test procedure and protocol**

80 Body height was measured and recorded in centimeters to the nearest millimeter; body weight  
81 was measured to the nearest 0.1 kg using an electronic weighing scale, with the participant  
82 wearing shorts and a T-shirt. The Rohrer index was calculated using the following formula:

83 Rohrer index =  $10 \times \text{height (m)} / \text{weight (kg)}^3$ .

84 Static postural stability and FT were assessed using a foot pressure plate (Win-Pod,  
85 Medicapteurs, France). All participants were instructed to maintain an upright standing position  
86 on the platform, barefoot, with their arms hanging by their sides and their feet parallel to each  
87 other. They were tested two times with their eyes open and two times with their eyes closed, each  
88 test lasting 20 s.

89 The inspection was performed using the postural mode, and the following parameters were  
90 measured to evaluate static postural stability: the sway path length of the center of pressure (COP-  
91 path) and the area of the ellipse defined as the size of the area marked by the center of pressure  
92 (COP-area). Of the two measurements, one with the smaller COP-path was used for the analysis.

93 Based on a previous report [4], we calculated the FT score using the image of the plantar

94 footprint obtained at the postural stability measurement. As with postural stability, the footprint  
95 with the smaller COP-path was used. For the 10 toes of both feet, if a toe appeared clearly on the  
96 image (shown in red to green in the plantar pressure chart in Fig 1), 2 points were given; if it  
97 appeared unclearly (shown in blue in the plantar pressure chart in Fig 1), 1 point was given; and  
98 if it did not appear, no points were given. The points were summed to realize FT score (Fig 1). If  
99 FT score was  $\geq 18$  points and the big toe of both feet had gained 2 points, the participants were  
100 placed in the “contact toe” group; those with 11 to 17 points were placed in the “incomplete  
101 contact toe” group; and those with  $\leq 10$  points were placed in the FT group.

102

103 **Fig 1. Example of plantar pressure chart.** One yellow and one green toe on the right foot and  
104 one yellow and one blue toe on the left foot resulted in a FT score of 7 points in this case.

105

## 106 **Statistical analyses**

107 To evaluate the intraobserver agreement for FT score, the measurements of 20 randomly selected  
108 plantar footprints were repeated by the same reader (T.F.) during the course of two sessions at  
109 least 1 month apart. For interobserver agreement, a second reader (M.W.) repeated the  
110 measurements for the same 20 participants. Interobserver and intraobserver reliabilities for FT  
111 score were assessed by estimating intraclass correlation coefficients (ICCs) along with 95%

112 confidence intervals (CIs) using an ICC (2,1) modeling scheme.

113 The unpaired t-test was used for investigating the sex differences of each parameter. The paired

114 t-test was used to examine the differences in FT score, COP-path, and COP-area between the

115 eyes-open and eyes-closed conditions. Pearson's correlation coefficients were used to investigate

116 the correlations between each measurement. Statistical significance was set at  $p < 0.05$ .

117

## 118 **Results**

119 The interobserver and intraobserver reliabilities of FT score of the 20 randomly selected

120 participants were 0.969 (95% CI, 0.924 - 0.988) and 0.989 (95% CI, 0.973 - 0.996), respectively.

121 These values indicated substantial agreement (ICC,  $>0.9$ ).

122 Table 1 shows summaries of height, weight, and Rohrer index of all participants. There were no

123 significant gender differences in height, weight, and Rohrer index, and none of these participants

124 had an extreme body posture.

125

126 **Table 1. Height, weight, and Rohrer index of all participants (mean  $\pm$  SD)**

|              | total (n=396)    | female (n=216)   | male (n=180)     |
|--------------|------------------|------------------|------------------|
| height (cm)  | 124.8 $\pm$ 5.0  | 125.0 $\pm$ 4.8  | 124.6 $\pm$ 5.1  |
| weight (Kg)  | 24.7 $\pm$ 4.3   | 24.8 $\pm$ 4.2   | 24.5 $\pm$ 4.5   |
| Rohrer index | 126.2 $\pm$ 14.2 | 126.4 $\pm$ 14.8 | 126.0 $\pm$ 13.6 |

127



128 Table 2 shows the results of postural static stability. COP-path and COP-area of the total, female,  
129 and male participants in the eyes-closed condition were significantly larger than those in the eyes-  
130 open condition. Significant differences between boys and girls were observed in the COP-path  
131 and COP-area in eyes-closed condition.

132

133 **Table 2. COP-path and COP-area (mean  $\pm$  SD)**

|          | condition | total (n=396)      | female (n=216)     | male (n=180)        |
|----------|-----------|--------------------|--------------------|---------------------|
| COP-path | EO        | 200.1 $\pm$ 97.5   | 191.7 $\pm$ 81.5   | 210.3 $\pm$ 113.2   |
|          | EC        | 291.3 $\pm$ 147.2* | 274.1 $\pm$ 135.4* | 312.0 $\pm$ 158.2*† |
| COP-area | EO        | 192.5 $\pm$ 162.7  | 182.4 $\pm$ 142.1  | 204.8 $\pm$ 184.1   |
|          | EC        | 320.7 $\pm$ 278.0* | 285.1 $\pm$ 223.5* | 363.3 $\pm$ 327.3*† |

134 EO= eye open, EC= eye closed, COP-path= the total displacement of center of pressure. COP  
135 area= the area of the mean center of pressure

136 \*: significantly different with EO ( $p < 0.05$ , paired t-test).

137 †: significantly different with female ( $p < 0.05$ , unpaired t-test).

138

139 Table 3 shows the results of FT score. According to Fukuyama et al.'s criteria [4], the FT rate  
140 was very high at more than 90% under all conditions. FTS in the eyes-closed condition was  
141 significantly higher than that in the eyes-open condition in both sexes. There were no significant  
142 gender differences in FTS.

143

144 **Table 3. Floating toe score and classification (mean  $\pm$  SD)**

|                         |             | total (n=396) |                | female (n=216) |                | male (n=180)  |                |
|-------------------------|-------------|---------------|----------------|----------------|----------------|---------------|----------------|
|                         |             | EO            | EC             | EO             | EC             | EO            | EC             |
| FT score                |             | 3.7 $\pm$ 2.8 | 4.6 $\pm$ 3.4* | 3.6 $\pm$ 2.4  | 4.4 $\pm$ 3.1* | 3.7 $\pm$ 3.3 | 4.9 $\pm$ 3.7* |
| FT                      |             | 383           | 370            | 211            | 205            | 172           | 165            |
|                         |             | (96.7)        | (93.4)         | (97.7)         | (94.9)         | (95.6)        | (91.7)         |
| classification<br>n (%) | incomplete  | 11            | 23             | 5              | 10             | 6             | 13             |
|                         |             | (2.8)         | (5.8)          | (2.3)          | (4.6)          | (3.3)         | (7.2)          |
|                         | contact toe | 2             | 3              | 0              | 1              | 2             | 2              |
|                         |             | (0.5)         | (0.8)          | (0)            | (0.5)          | (1.1)         | (1.1)          |

145 EO= eye open, EC= eye closed, FT= floating toe.

146 \*: significantly different with EO ( $p < 0.05$ , paired t-test).

147

148 Table 4 shows the correlations between static postural stability and FT score in the eyes-open

149 and eyes-closed conditions. FT score had a significantly moderate correlation with COP-path and

150 COP-area in both eyes-open and eyes-closed conditions in boys and significant but weak

151 correlation in girls.

152

153 **Table 4. Pearson's correlation coefficient of the measurements**

154 **a: eyes-open condition.**

|  |  | FT score |        |      |
|--|--|----------|--------|------|
|  |  | total    | female | male |
|  |  |          |        |      |

|          |        |        |        |
|----------|--------|--------|--------|
| COP-path | 0.411* | 0.275* | 0.495* |
| COP-area | 0.377* | 0.220* | 0.480* |

---

155

156 **b: eyes-closed condition.**

---

|          | FTS    |        |        |
|----------|--------|--------|--------|
|          | total  | female | male   |
| COP-path | 0.486* | 0.411* | 0.545* |
| COP-area | 0.486* | 0.352* | 0.578* |

---

157 EO= eye open, EC= eye closed, FT= floating toe.

158 COP-path= the total displacement of center of pressure. COP-area= the area of the mean center  
159 of pressure.

160 \*:  $p < 0.05$

161

## 162 **Discussion**

163 We assessed 396 8-year-old children for FT and static postural stability. COP-path and COP-  
164 area in the eyes-closed condition were significantly larger than those in the eyes-open condition,  
165 and the postural stability in girls was higher than that in boys in the eyes-closed condition. We  
166 found a fairly high rate of FT in all participants and a higher FT score in the eyes-closed condition  
167 than in the eyes-open condition. Moreover, there were significant correlations between the FT  
168 score and COP-path and COP-area. To our knowledge, this is the first report on the relationship  
169 between FT and postural stability.

170 The result suggesting higher static postural stability in females is similar to that in previous  
171 reports. A majority of previous studies have found that the balancing ability of girls is better than  
172 that of boys and that the sex differences in postural stability among children may explain  
173 maturational differences in the central nervous structures [13–18]. de Sá et al. reported that in  
174 children, the visual system matures before the vestibular system; therefore, the open-eyes postural  
175 stability is first achieved at 5 to 7 years of age before the closed-eyes postural stability [13]. The  
176 vestibular system is believed to mature faster in girls. Hirabayashi et al. showed that girls were  
177 superior to boys with respect to vestibular function at the age of 7-8 years [14]. Lenroot et al.  
178 reported that girls reached peak values of brain volumes earlier than boys [15]. The current study  
179 revealed that the static postural stability of girls is better than that of boys only in the eyes-closed  
180 condition. These results may be due to the dominance of the vestibular system in using vestibular  
181 cues under the condition of no visual cues and inaccurate somatosensory input. Thus, the results  
182 of static postural stability are almost the same as those in previous reports.

183 The toe plays an important role in stabilizing the standing posture and walking by increasing the  
184 ground contact area [2,3], and FT is a condition in which the toes do not contact the ground in the  
185 standing position. In recent years, some reports have shown that the frequency of FT in children  
186 ranges from 40% to 98%. Araki et al. assessed 198 children aged 3 to 5 years using footprint  
187 images and reported that FT was found in 87.7% to 98.7% of them [5]. Tasaka et al. studied 635

188 children aged 9 to 11 years and reported that 40.3% of all feet had no toe contact with the floor at  
189 all, and they were concerned about the trend of declining foot function in children [10]. Despite  
190 differences in the methods used by each author to assess FT, the rate of FT were similarly high in  
191 the current study.

192 Although there have been some reports on postural stability and foot posture, there has been  
193 no report in English on the relationship between postural stability and FT. The current study  
194 showed that the body was more unstable in cases with more ground contact toes. If toe contact is  
195 directly important for postural stability, the greater the FT score, the more stable will be the center  
196 of gravity. The results of the current study indicate that larger the FT score, greater the COP-path  
197 and COP-area, suggesting that toes stabilize the body that becomes unstable when eyes are closed.  
198 In other words, ground contact of the toes is not directly related to static postural stability in  
199 children, but it may function to stabilize the body when the condition becomes unstable. Moreover,  
200 the current study revealed that the FT score of the total, female, and male cases in the eyes-closed  
201 condition was greater than that in the eyes-open condition. This is probably the result of grounding  
202 the toes in an attempt to control the unstable body caused by eyes closure and may support the  
203 theory described above.

204 Our study had several limitations. First, we evaluated FT using the plantar pressure diagram  
205 obtained from the foot pressure plate. As there is no standard method to evaluate FT, it is not

206 exactly possible to compare the results of the current study with previous reports on the frequency  
207 of FT. However, the number of cases is sufficient in our study, and we think there is no doubt  
208 about the results of the high frequency of FT. Second, in the present study, only the  
209 interrelationship between FT and static postural stability was examined. Based on our results  
210 indicating lesser static postural stability in cases with higher FT score, we found no direct  
211 relationship between FT and static postural stability. However, we were not able to prove it  
212 directly. We speculate that various other factors are involved among these factors in a complex  
213 manner. Furthermore, it has been reported that static postural stability reflects several physical  
214 factors other than nervous system maturation. Angin et al. reported that postural sway velocity  
215 increases with pronation of the foot [19]. Likewise, Cote et al. reported that postural stability was  
216 greater in pronators than in supinators [20]. In the current research series, we have measured and  
217 saved data on plantar footprints, physical exercise habits of individuals and their parents, blood  
218 investigations, body composition such as body fat and muscle mass, and Pediatric Evaluation of  
219 Disability Inventory–Computer Adaptive Test (PEDI-CAT) to assess their mental development.  
220 In the future, we plan to investigate FT and postural stability in children using these data in a  
221 more multifaceted way. Moreover, we would like to study whether the high prevalence of FT  
222 decreases or remains the same as the children grow older.

223 As a side note, this study was conducted as an additional study to the Ministry of the

224 Environment's JECS. The views expressed in this paper are the authors' own and not those of the

225 Ministry of the Environment.

226 In conclusion, this study demonstrated that the frequency of FT in healthy 8-year-old children

227 was very high. Our results suggested that FT is not directly related to retention of the standing

228 posture in children; however, the toes do play a role by making ground contact in conditions when

229 static postural stability is compromised and the standing posture becomes unstable. At least at 8

230 years of age, although FT is very common, it is not directly related to postural control and

231 considered to have little pathological significance.

232

## 233 **Acknowledgements**

234 We are grateful to all the participants of the JECS-Y and to all individuals involved in data

235 collection. We also thank the following members of the JECS-Y as of 2020: Zentaro Yamagata,

236 Ryoji Shinohara, Sanae Otawa, Anna Kobayashi, Sayaka Horiuchi, and Megumi Kushima

237 (Center for Birth Cohort Studies, Interdisciplinary Graduate School of medicine, University of

238 Yamanashi, Chuo, Japan); Takeshi Inukai and Emi Sawanobori (Department of Pediatrics, School

239 of Medicine, University of Yamanashi, Chuo, Japan); Kyoichiro Tsuchiya (Third Department of

240 Internal Medicine, University of Yamanashi, Chuo, Japan); Takahiko Mitsui (Department of

241 Urology, Interdisciplinary Graduate School of Medicine, University of Yamanashi, Chuo, Japan);

242 Kenji Kashiwagi (Department of Ophthalmology, University of Yamanashi, Chuo, Japan); Daijyu  
243 Sakurai and Hiroyuki Watanabe (Department of Otorhinolaryngology-Head and Neck Surgery,  
244 School of Medicine, University of Yamanashi, Chuo, Japan); Koichiro Ueki and Naana Baba,  
245 (Department of Oral and Maxillofacial Surgery, Interdisciplinary Graduate School of Medicine,  
246 University of Yamanashi, Chuo, Japan); and Hiroshi Yokomichi, Kunio Miyake, Yuka Akiyama,  
247 Tadao Ooka, and Reiji Kojima (Department of Health Sciences, School of Medicine, University  
248 of Yamanashi, Chuo, Japan).

249

## 250 **References**

- 251 [1] Lambrinudi C. Use and abuse of toes. *Postgrad Med J.* 1932; 8: 459–464.
- 252 [2] Chou SW, Cheng HYK, Chen JH, Ju YY, Lin YC, Wong MKA. The role of the great toe  
253 in balance performance. *J Orthop Res.* 2009;27: 549-554.
- 254 [3] Hughes J, Clark P, Klenerman L. The importance of the toes in walking. *J Bone Joint*  
255 *Surg.* 1990;72: 245-251.
- 256 [4] Fukuyama K, Maruyama H. Occurrence of floating toe from the viewpoint of the  
257 structure of foot arch. *J Phys Ther Sci.* 2011;23:33-36.
- 258 [5] Araki T, Masuda T, Jinno T, Morita S. Incidence of floating toe and its association with  
259 the physique and foot morphology of Japanese children. *J Phy Ther Sci.* 2015;27: 3159-



- 260 3162.
- 261 [6] Hofstaetter SG, Hofstaetter JG, Petroutsas JA, Gruber F, Ritschl P, Trnka H. The Weil  
262 osteotomy. A seven-year follow-up. *J Bone Joint Surg.* 2005;87: 1507-1511.
- 263 [7] Miguez A, Slullitel G, Bilbao F, Carrasco M, Solari G. Floating-toe deformity as a  
264 complication of the Weil osteotomy. *Foot Ankle Int.* 2004;25: 609-613.
- 265 [8] Trnka HJ, Nyska M, Parks BG, Myerson MS. Dorsiflexion contracture after the Weil  
266 osteotomy: results of cadaver study and three-dimensional analysis. *Foot Ankle Int.*  
267 2001;22: 47-50.
- 268 [9] Perez HR, Reber LK, Christensen JC. The Role of Passive Plantar Flexion in Floating  
269 Toes Following Weil Osteotomy. *J Foot Ankle Surg.* 2008;47: 520-526.
- 270 [10] Tasaka S, Matsubara K, Nishiguchi S, Fukutani N, Tashiro Y, Shirooka H, et al.  
271 Association between floating toe and toe grip strength in school age children: A cross-  
272 sectional study. *J Phys Ther Sci.* 2016;28: 2322-2325.
- 273 [11] Saito R, Okamoto S, Sakamoto M. Effect of toe contact condition during forward  
274 stepping on the ground reaction forces during turning movement. *J Phys Ther Sci.*  
275 2019;31: 344-348.
- 276 [12] Kawamoto T, Nitta H, Murata K, Toda E, Tsukamoto N, Hasegawa M, et al. Rationale  
277 and study design of the Japan environment and children's study (JECS). *BMC Public*

- 278 Health. 2014 January 10. doi: <https://doi.org/10.1186/1471-2458-14-25>
- 279 [13] de Sá C dos SC, Boffino CC, Ramos RT, Tanaka C. Development of postural control  
280 and maturation of sensory systems in children of different ages a cross-sectional study.  
281 Braz J Phys Ther. 2018;22: 70-76.
- 282 [14] Hirabayashi S, Iwasaki Y. Developmental perspective of sensory organization on  
283 postural control. Brain Dev. 1995;17: 111-113.
- 284 [15] Lenroot RK, Giedd JN. Sex differences in the adolescent brain. Brain Cogn. 2010;72:  
285 46-55.
- 286 [16] Plandowska M, Lichota M, Górnjak K. Postural stability of 5-year-old girls and boys  
287 with different body heights. PLoS ONE. 2019;14: 1-10.
- 288 [17] Smith AW, Ulmer FF, Wong DP. Gender differences in postural stability among  
289 children. J Hum Kinet. 2012;33: 25-32.
- 290 [18] Steindl R, Kunz K, Schrott-Fischer A, Scholtz AW. Effect of age and sex on maturation  
291 of sensory systems and balance control. Dev Med Child Neurol. 2006;48: 477-482.
- 292 [19] Angin S, İlçin N, Yeşilyaprak SS, Şimşek IE. Prediction of postural sway velocity by  
293 foot posture index, foot size and plantar pressure values in unilateral stance. Eklem  
294 Hastalıkları ve Cerrahisi. 2013;24:144-148.
- 295 [20] Cote KP, Brunet ME, Gansneder BM, Shultz SJ. Effects of pronated and supinated foot

296 postures on static and dynamic postural stability. *J Athl Train.* 2005;40: 41-46.

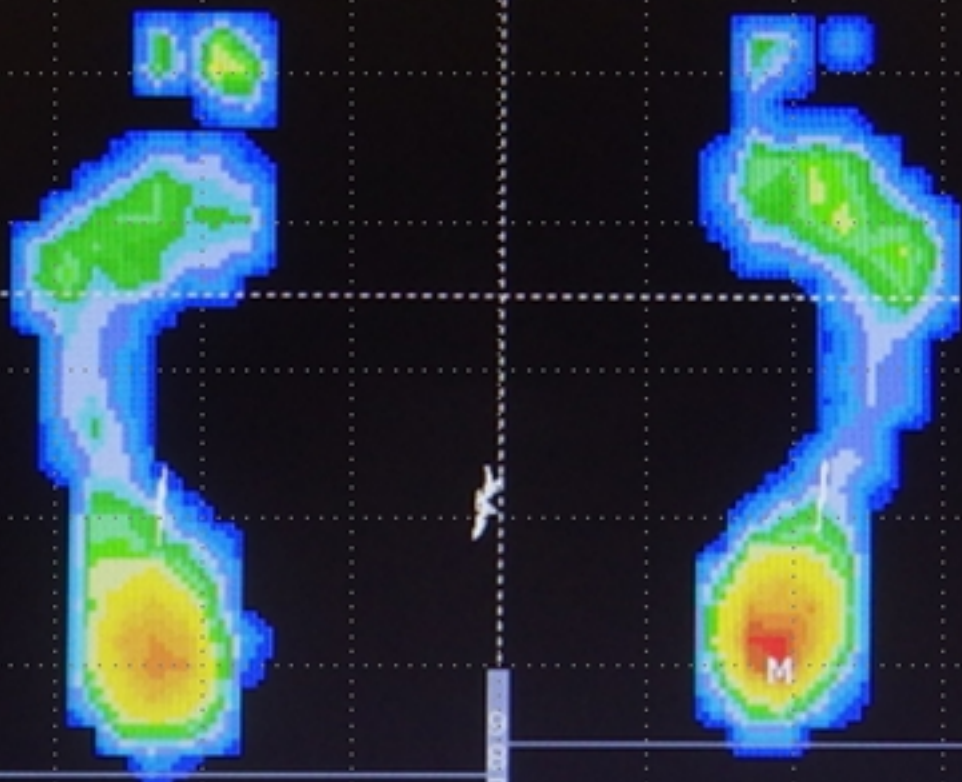

Figure
